# Supplementary material for: Orientation and repositioning of chromosomes correlate with cell geometry–dependent gene expression
Source: PubMed Central journal article supplement — Mol Biol Cell. 2017 Jul 7;28(14):1997–2009. doi: 10.1091/mbc.E16-12-0825 (PMC5541849; doi:10.1091/mbc.e16-12-0825), 2017-07-07
Supplement: supp_E16-12-0825v1_CombinedSupMats.pdf [file supp_E16-12-0825v1_CombinedSupMats.pdf]

# Supplemental Materials

*Molecular Biology of the Cell*

Wang et al.

## SUPPLEMENTARY FIGURE LEGENDS

**Figure S1: Cell geometry altered nuclear morphology and chromatin compaction.** (A) Low magnification images of fibronectin patterns (yellow). Scale bar: 20  $\mu\text{m}$ . (B) Representative confocal images of NIH 3T3 cells labeled with phalloidin (red) and Hoechst (blue) cultured on these patterns. Scale bar: 20  $\mu\text{m}$ . Images below are Imaris generated surface plot of nucleus in AP and IP substrates. (C) Dot plot quantifying the nuclear maximum projected area, nuclear height, and nuclear volume normalized to the AP nuclear volume. Data is presented as mean  $\pm$  SD with  $20 < n < 30$ . \*\*\*  $P < 0.001$ . Two sample student's t test. (D) Representative color map showing the compaction of chromatin (stained with Hoechst) in nucleus of cells cultured on AP and IP substrates. Dot plot showing the normalized Hoechst mean intensity in the nucleus on AP and IP substrates. Data is presented as mean  $\pm$  SD with  $16 < n < 20$ . \*  $P < 0.05$ . Two sample student's t test. (E) Representative confocal (up) and thresholded (below) images showing Chr2 (red), and Chr6 (green) in nuclei (blue) of cells on AP and IP substrates. Scale bar: 5  $\mu\text{m}$ . **Experiments were performed in triplicates.**

**Figure S2: Effects of cell geometry on the radial distance distribution and its correlation with CT length and gene density.** Radial distance difference matrix shows the difference of the radial distance between two heterologous chromosomes in AP and IP substrates. Row and column labels are the chromosome numbers painted in this study. **Experiments were performed in triplicates.**

**Figure S3: Thresholded and raw Pol II S5P images.** (A) Representative images of Chr1, 2, 3, 11, and 5 (green) with Pol II S5P (purple) in AP and IP substrates. (B) Representative raw immunofluorescence images of DNA (green) and Pol II S5P (red). Scale bar: 5  $\mu\text{m}$ .

**Figure S4: Activated form of RNA Pol II was revealed as pocket like structures at the surface of CTs.** (A) Chromosome paint combined with immunofluorescent images of Chr2 (green), and 5S RNA pol2 (pink) with the nuclear outline (white) in xy plane. Scale bar: 5  $\mu\text{m}$ . The right images are the orthogonal views of the region cropped by the orange box. (B) Illustration of the 3D erosion quantification for the distribution of 5S RNA pol2 pockets (pink) on CTs (green). (C) Bar graphs showing the distribution of 5S RNA pol2 pockets on all the painted CTs in shell 1, 2, and 3. Data is given as mean  $\pm$  SE with  $60 < n < 100$ . \*  $P < 0.05$ ; \*\*  $P < 0.01$ ; \*\*\*  $P < 0.001$  Two sample student's t test. **Experiments were performed in triplicates.**

**Figure S5: Thresholded images of all the CT pairs painted in this work, and the intermingling degree quantification of all the CT pairs.** (A) Thresholded images of all the CT pairs painted in this study in AP and IP substrates. (B) Bar graph quantifying the intermingling degree of all the CT pairs in AP and IP substrates. Data is presented as mean  $\pm$  SE with  $20 < n < 30$ . \*\*\*  $P < 0.001$ , \*\*  $P < 0.01$ , \*  $P < 0.05$ . Mann-Whitney U test. (C) Intermingling difference matrix shows the difference of the intermingling degree between two CT pairs in AP and IP substrates. Row and column labels are the CT pairs painted in this study. **Experiments were performed in triplicates.**

**Figure S6: Cell geometry regulates intermingling degrees.** (A) Representative images of Chr2-6, Chr5-9, Chr11-15, and Chr2-10 in AP and IP substrates. (B) Representative images showing the intermingling between Chr5 and Chr9. (C) Bar graph quantifying the intermingling degree between Chr5 and Chr9. Data is presented as mean  $\pm$  SE with  $40 < n < 50$ . N.S indicates not significant. Mann-Whitney U test. **Experiments were performed in triplicates.**

**Figure S7: Transcription is required for the increase in intermingling degrees, but not for the interior localization and reorientation of chromosomes.** (A) Representative images of nucleus stained by Hoechst, Chr11 (purple), Chr15 (green) Right: zoomed in image of the cropped regions by light blue and orange boxes. (B) Bar graph showing the intermingling degree of Chr11 and Chr15. Data is presented as mean  $\pm$  SE with  $20 < n < 30$ . \*\*\*  $P < 0.001$ . N.S denotes not significant. Mann-Whitney U test. (C,F) Bar graph showing the normalized radial distance of Chr11 and Chr15. Data is presented as mean  $\pm$  SE with  $20 < n < 30$ . \*  $P < 0.05$ . n.s denotes not significant. Mann-Whitney U test. (D, E, G, H) Bar graph showing the orientation of Chr11 and Chr15. Data is presented as mean  $\pm$  SE with  $50 < n < 100$ . \*\*\*  $P < 0.001$ ; \*\*  $P < 0.01$ ; \*  $P < 0.05$ . n.s denotes not significant. Two sample student's t test. **Experiments were performed in triplicates.**

**Figure S8: Compartmentalization of transcription factors affects chromosome intermingling.** (A) (B) Representative images of nucleus stained by Hoechst and MRTF-A (red). Scale bar: 5  $\mu\text{m}$ . (C) (D) Representative images of nucleus stained by Hoechst and p65 (red). Scale bar: 5  $\mu\text{m}$ . (E) Bar graph showing the nuclear to cytoplasmic (N/C) ratio of MRTF-A and p65. Data is presented as mean  $\pm$  SE with  $40 < n < 50$ . \*\*\*  $P < 0.001$ . Two sample student's t test. Experiments were performed in triplicates.

**Figure S9: Mapping the CT orientations from top and side views.**

(A) Orientation map for all the painted chromosomes in AP and IP nucleus in XY plane. Each double-arrow line represents the major axis of one chromosome.  $\gamma_{xy}$  was measured as the angle between the major axis of chromosome and the major axis of nucleus. (B) The distribution of  $\gamma_{xy}$  for all the painted chromosomes in AP and IP nucleus in XY plane. Inset: bar graph quantifying the  $\gamma_{xy}$  in AP and IP substrates. Data is presented as mean  $\pm$  SD with  $1000 < n < 1500$ . \*\*\*  $P < 0.001$ . Mann-Whitney U test. (C) Orientation map for all the painted chromosomes in AP and IP nucleus in XZ plane. Each double-arrow line represents the major axis of one chromosome.  $\gamma_{xz}$  was measured as the angle between the major axis of chromosome and the major axis of nucleus. (D) The distribution of  $\gamma_{xz}$  for all the painted chromosomes in AP and IP nucleus in XZ plane. Inset: bar graph quantifying the  $\gamma_{xz}$  in AP and IP substrates. Data is presented as mean  $\pm$  SD with  $1000 < n < 1500$ . \*\*\*  $P < 0.001$ . Mann-Whitney U test. (E) Side view orientation mapping for Chr5-9, Chr2-10, and Chr15-11 in AP and IP substrates. Experiments were performed in triplicates.

**Figure S10: Illustration of the z score calculation for chromosome activity.** Scatter plot of the transcription activity of 19 chromosomes in AP substrates. The black solid line indicates the average activity of the 19 chromosomes, and the distance between the solid line and the dashed lines indicates one standard deviation ( $\sigma$ ). The z score is defined by the difference between the activity of each chromosome and the average activity, divided by one standard deviation ( $\sigma$ ), as seen from the equation.

**Figure S11: Coupling between chromosome reorganization and transcriptome change.** (A) Heatmap of chromosome activity in anisotropic (AP) and isotropic (IP) substrates. (B) Scatter plot of radial distance change and chromosome activity change between AP and IP substrates. (C) Randomized heatmap of chromosome activity. (D) Scatter plot of radial distance change randomized chromosome activity change. (E) Heatmap of interchromosome activity distance in anisotropic (AP) and isotropic (IP) substrates. (F) Scatter plot between intermingling change and interchromosome activity distance change between AP and IP substrates. (G) Randomized heatmap of interchromosome activity distance. (H) Scatter plot between intermingling change and randomized interchromosome activity distance change. Experiments were performed in triplicates.

**Figure S12: NF- $\kappa$ B target genes and SRF/ MRTF-A target genes.** (A) (C) NF- $\kappa$ B target genes and SRF/ MRTF-A target genes across the genome above the foldchange of 1.2 between AP and IP substrates. Values are log2 foldchange of expression of genes in IP substrates divided by that in AP substrates. Positive values (light color) indicate upregulation in IP substrates and negative values (dark color) indicate downregulation, compared to AP substrates. (B) (D) NF- $\kappa$ B target genes and SRF/ MRTF-A target genes on the painted chromosome pairs. Experiments were performed in triplicates.

**Figure S13: Correlations between chromosome position and compaction.** (A) Scatter plot between the fold change of chromosome volume and the fold change of normalized radial distance (NRD) in IP substrates vs AP substrates. (B) The scatter plot between chromosome intermingling and chromosome decompaction factor. Inset: bar graph showing the Pearson's correlation coefficient of this correlation in AP and IP substrates. Values on top of the bar graphs are p values of the correlations. (C) (D) Scatter plots between normalized radial distance and chromosome decompaction factor in AP (C) and IP (D) substrates.

**Figure S14: Metaphase Spread of NIH3T3 cells.** (A) Metaphase Spread showing the chromosomes of NIH3T3 cells. Average chromosome copy number was 64 with a standard deviation of  $\pm 5$  chromosomes within the population.

**Figure S15: DNA intensity distribution.** Widefield images of nuclei in AP cells (A) and CI cells (B). (C) A histogram showing the frequency distribution of the Nuclear (DNA) Intensity for AP and CI cells. N= 101 (AP) and 97 (CI)

**Figure S16: Effect of Fixation on 3D chromatin structure.** (A & B) Images of nuclei before and after fixation. The merged image represents the overlap. In order to quantify this, we have calculated the correlation coefficient (P) of the entire nucleus in 3D before and after fixation. The correlation coefficients for 5 nuclei are represented in the boxplot (C).

**Supplementary Movie.** Demonstrates the algorithm in 2D for packing 10 ellipses into an enclosing ellipse that deforms stepwise into an enclosing circle; the packing of the inscribed ellipses is updated at each step so as to minimize the pairwise overlap.

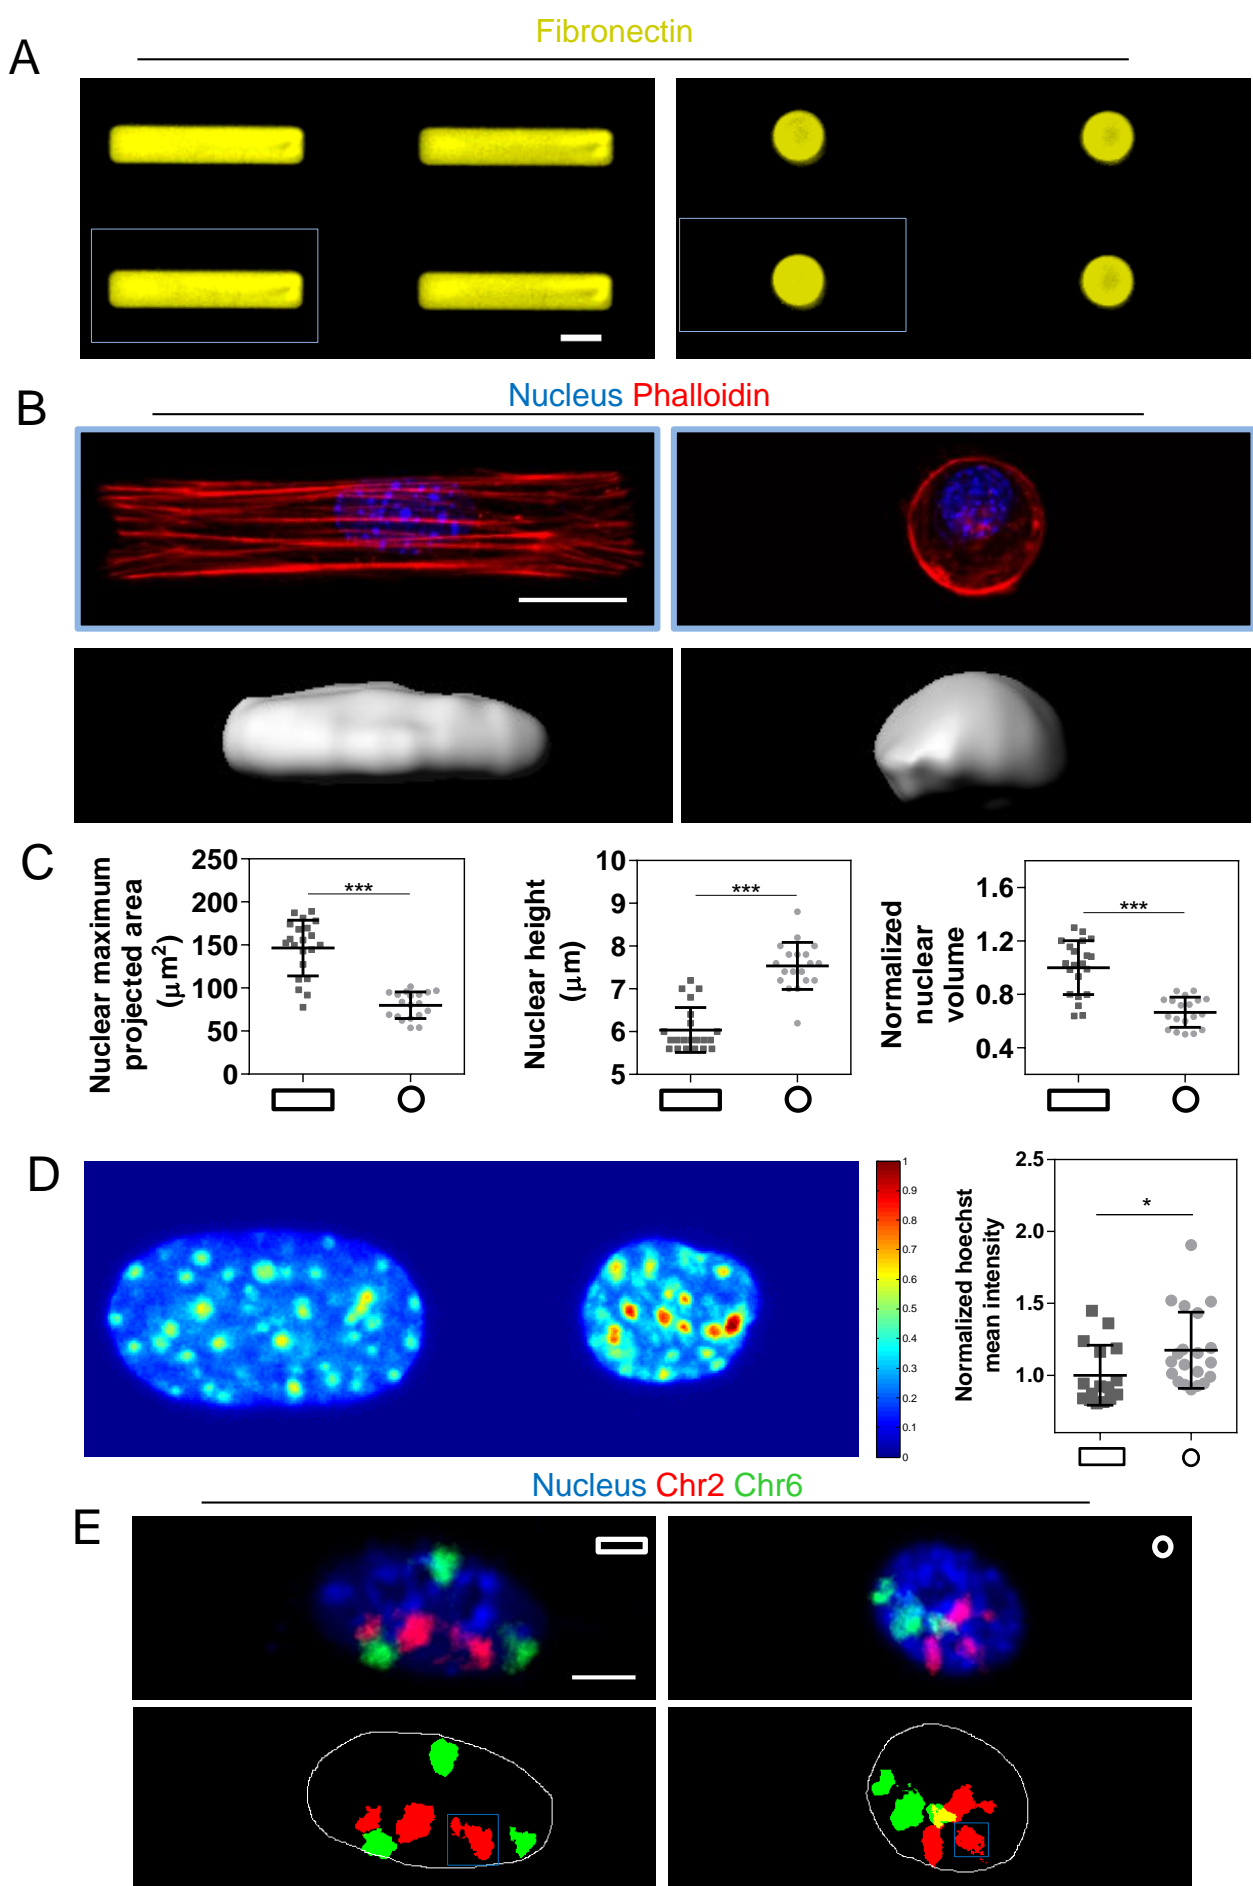

Figure S1

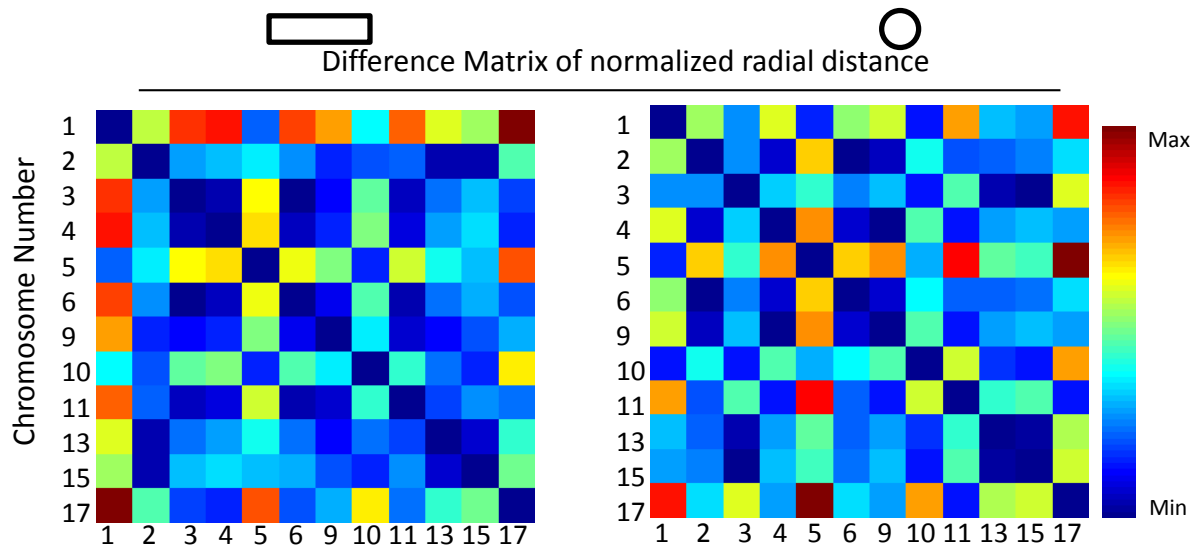

Figure S2

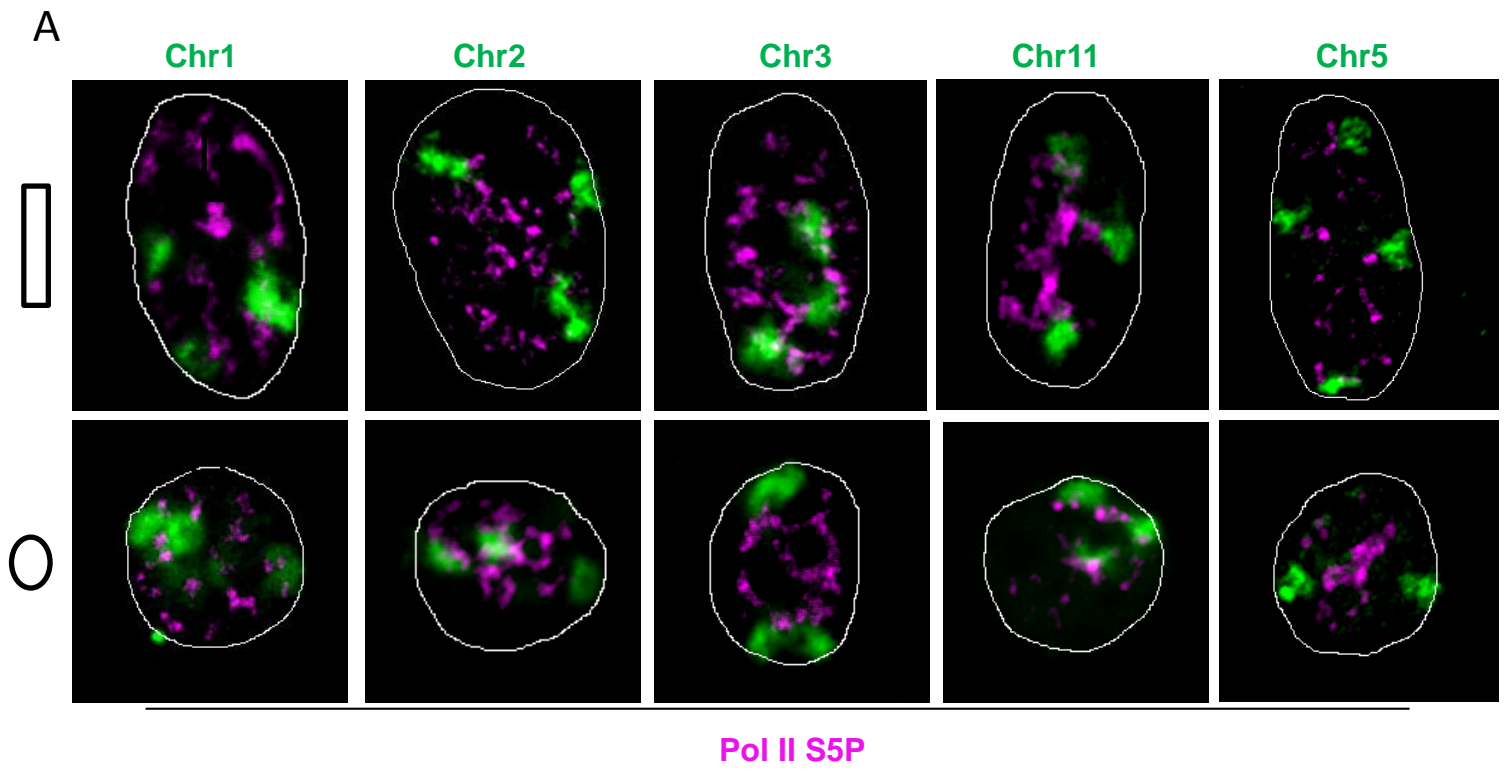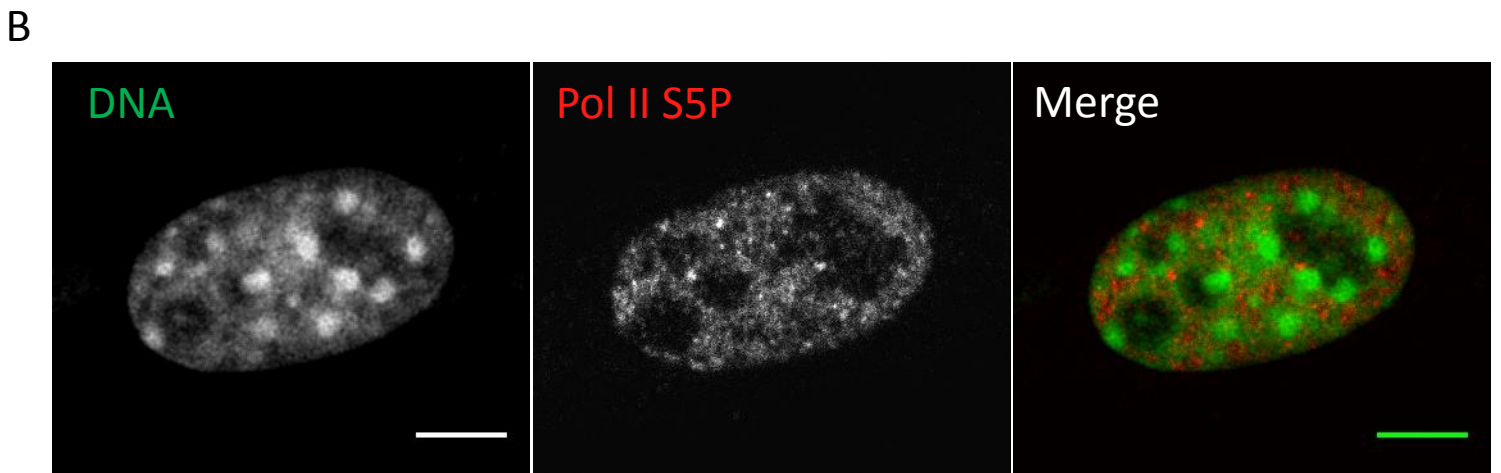

Figure S3

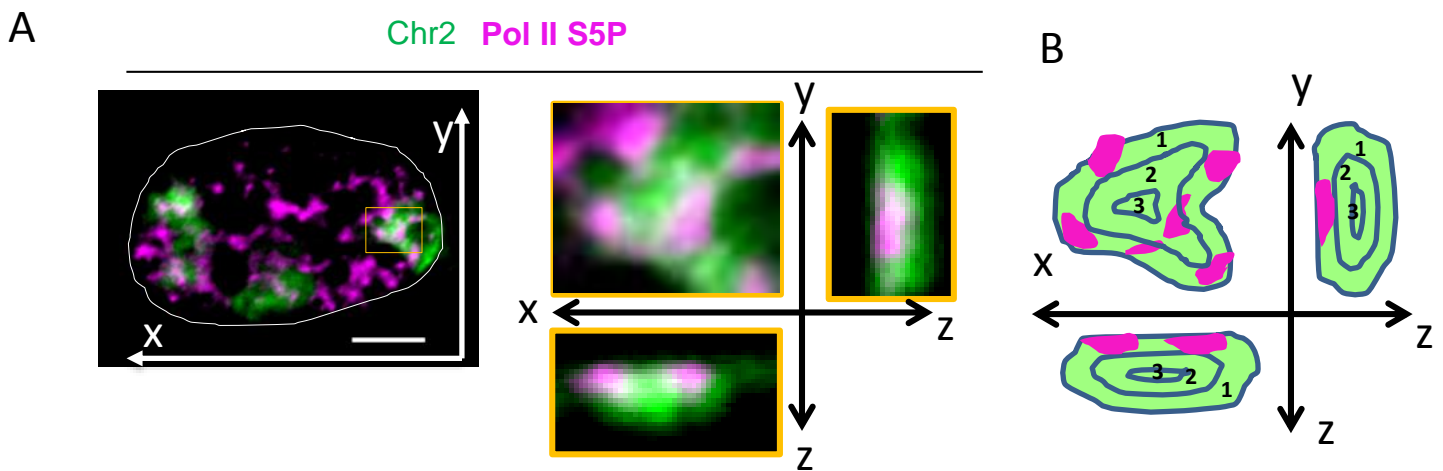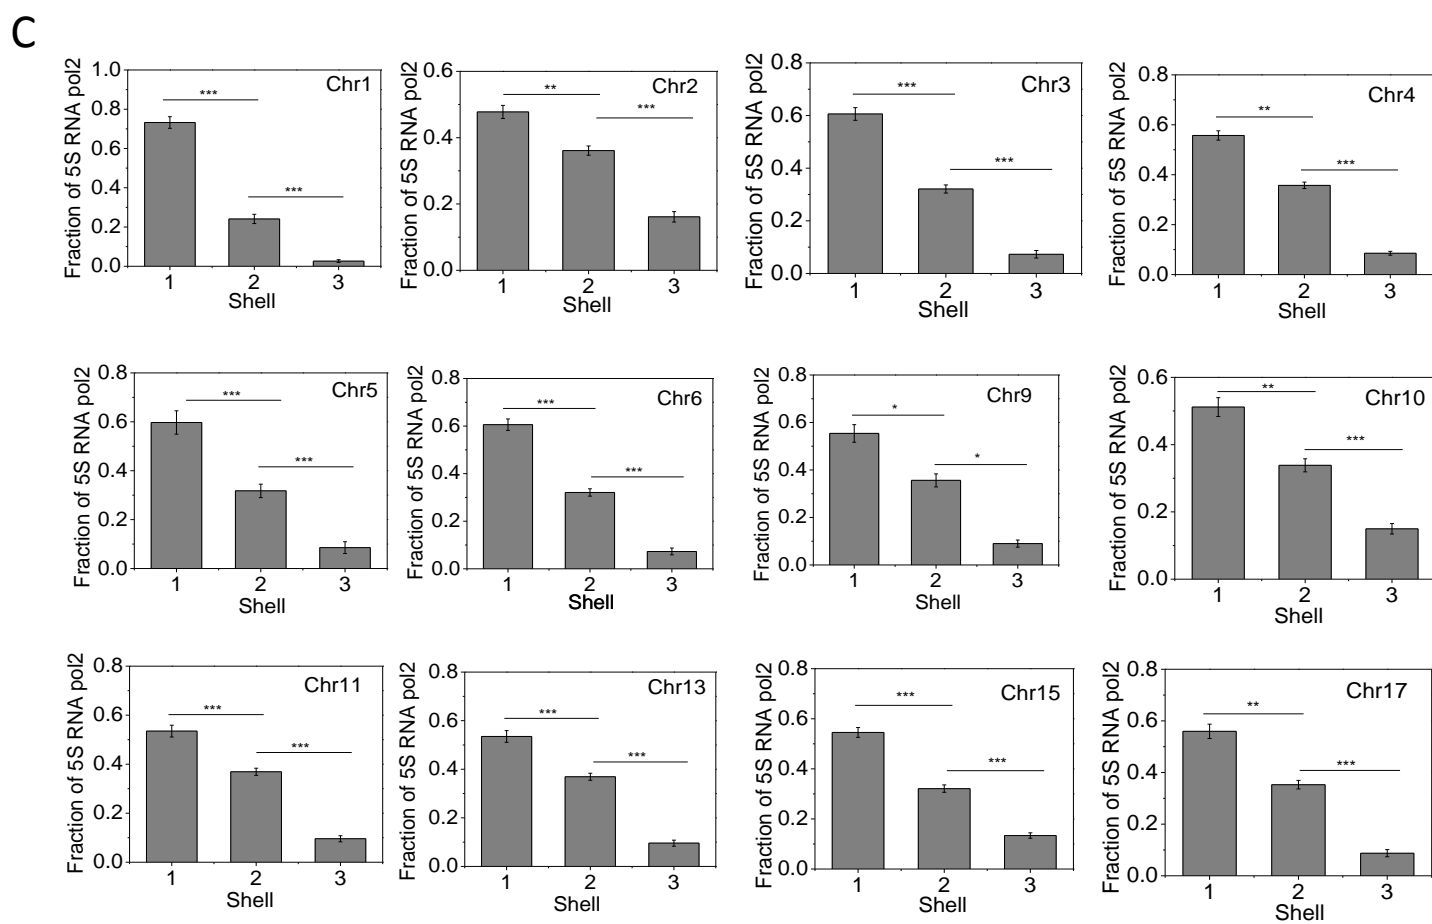

Figure S4



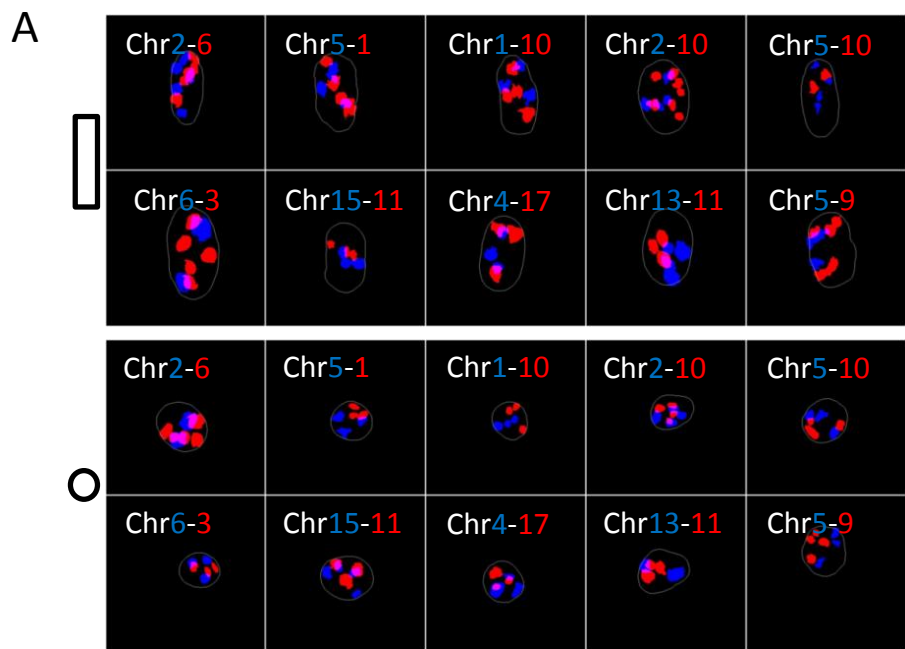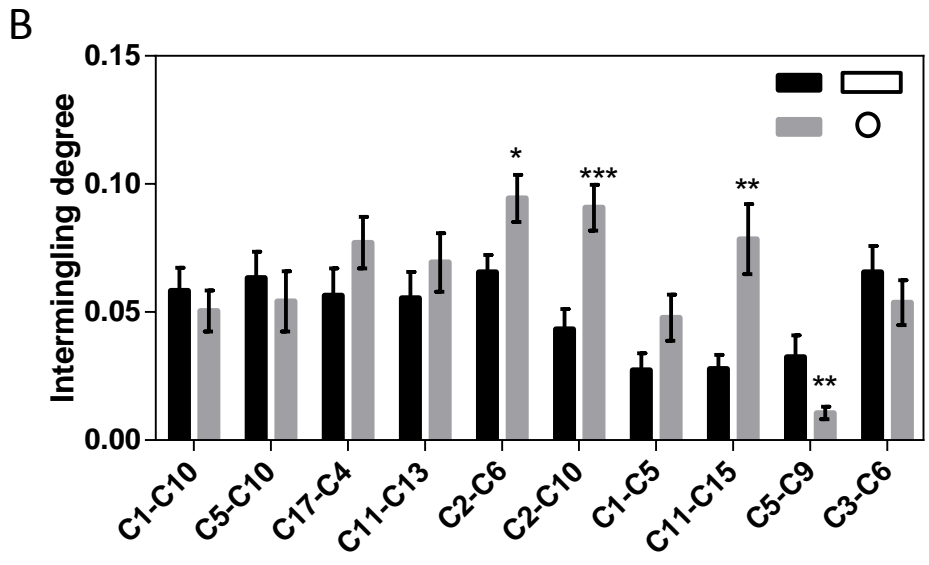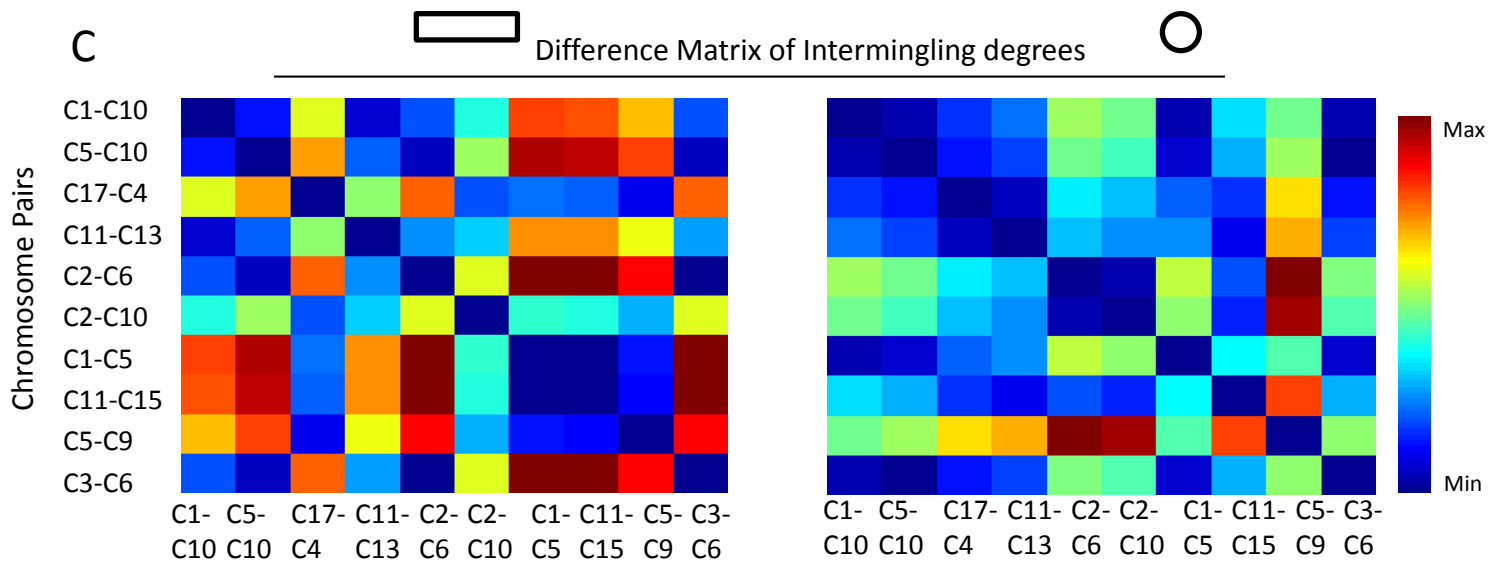

Figure S5

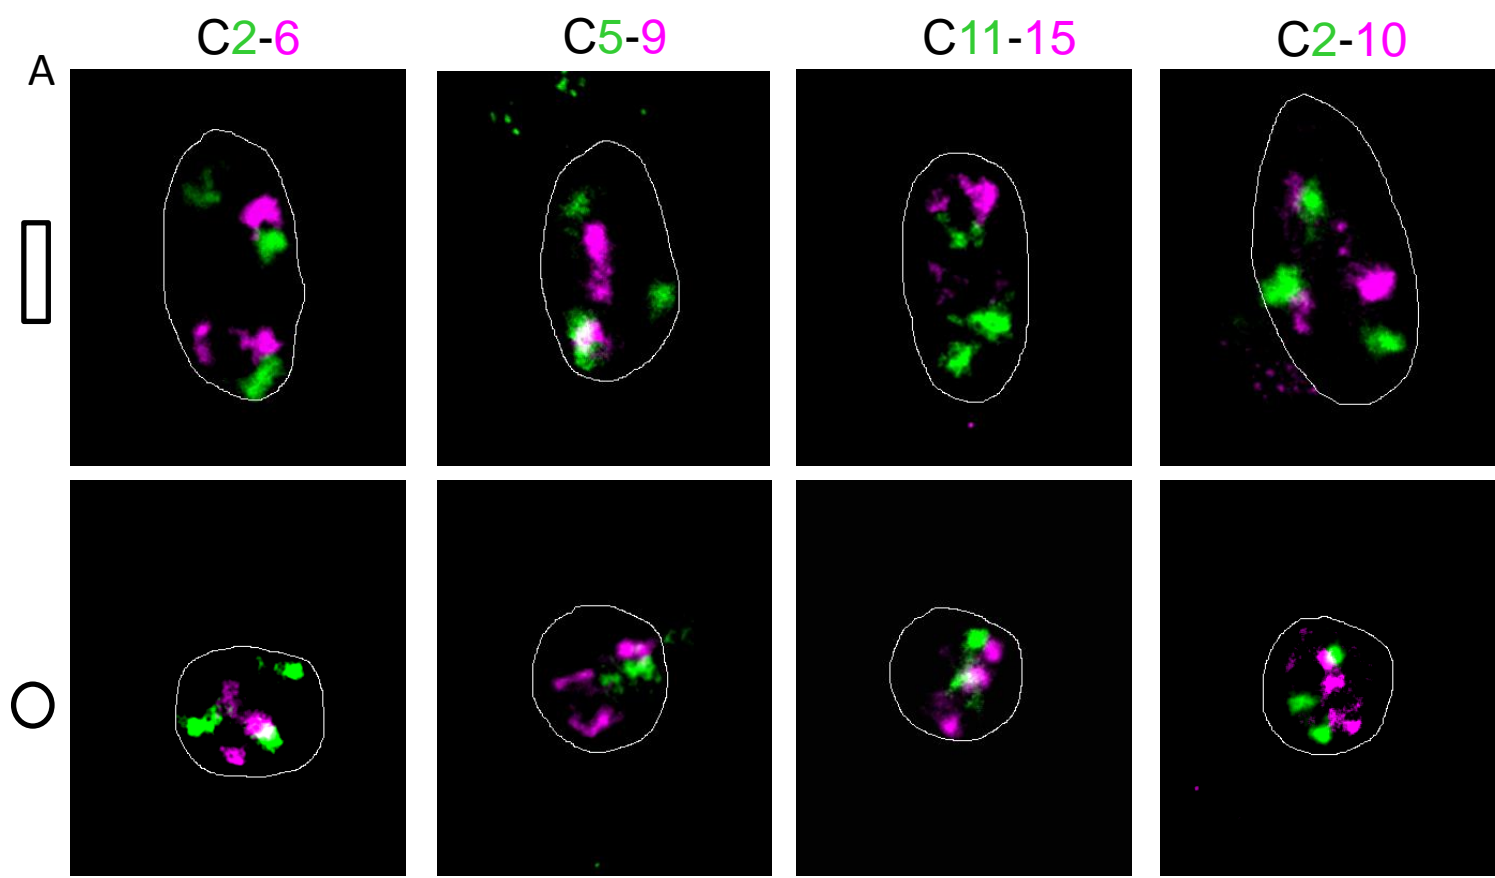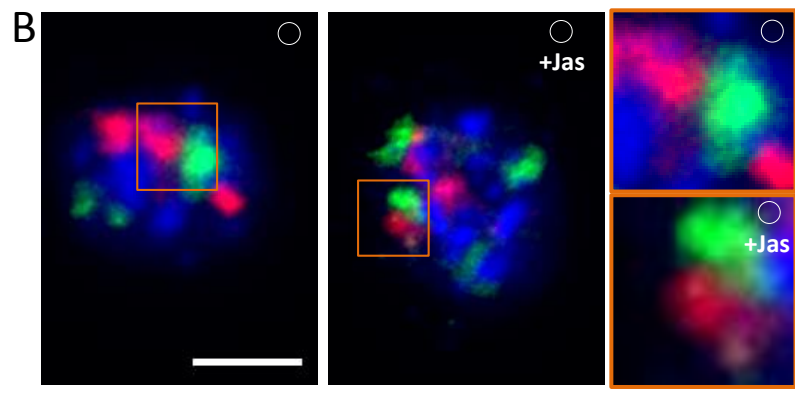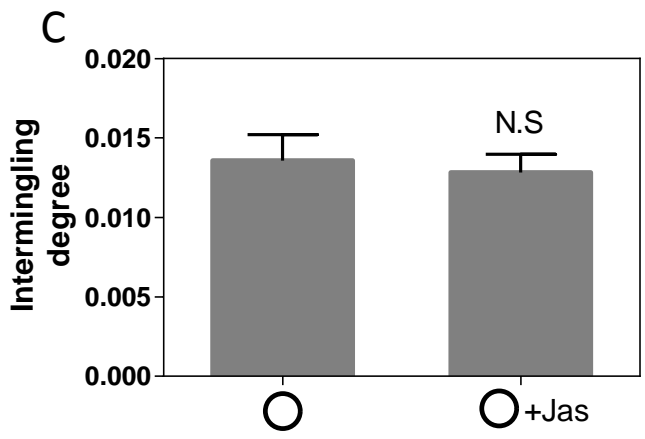

Figure S6

Chr11-Chr15

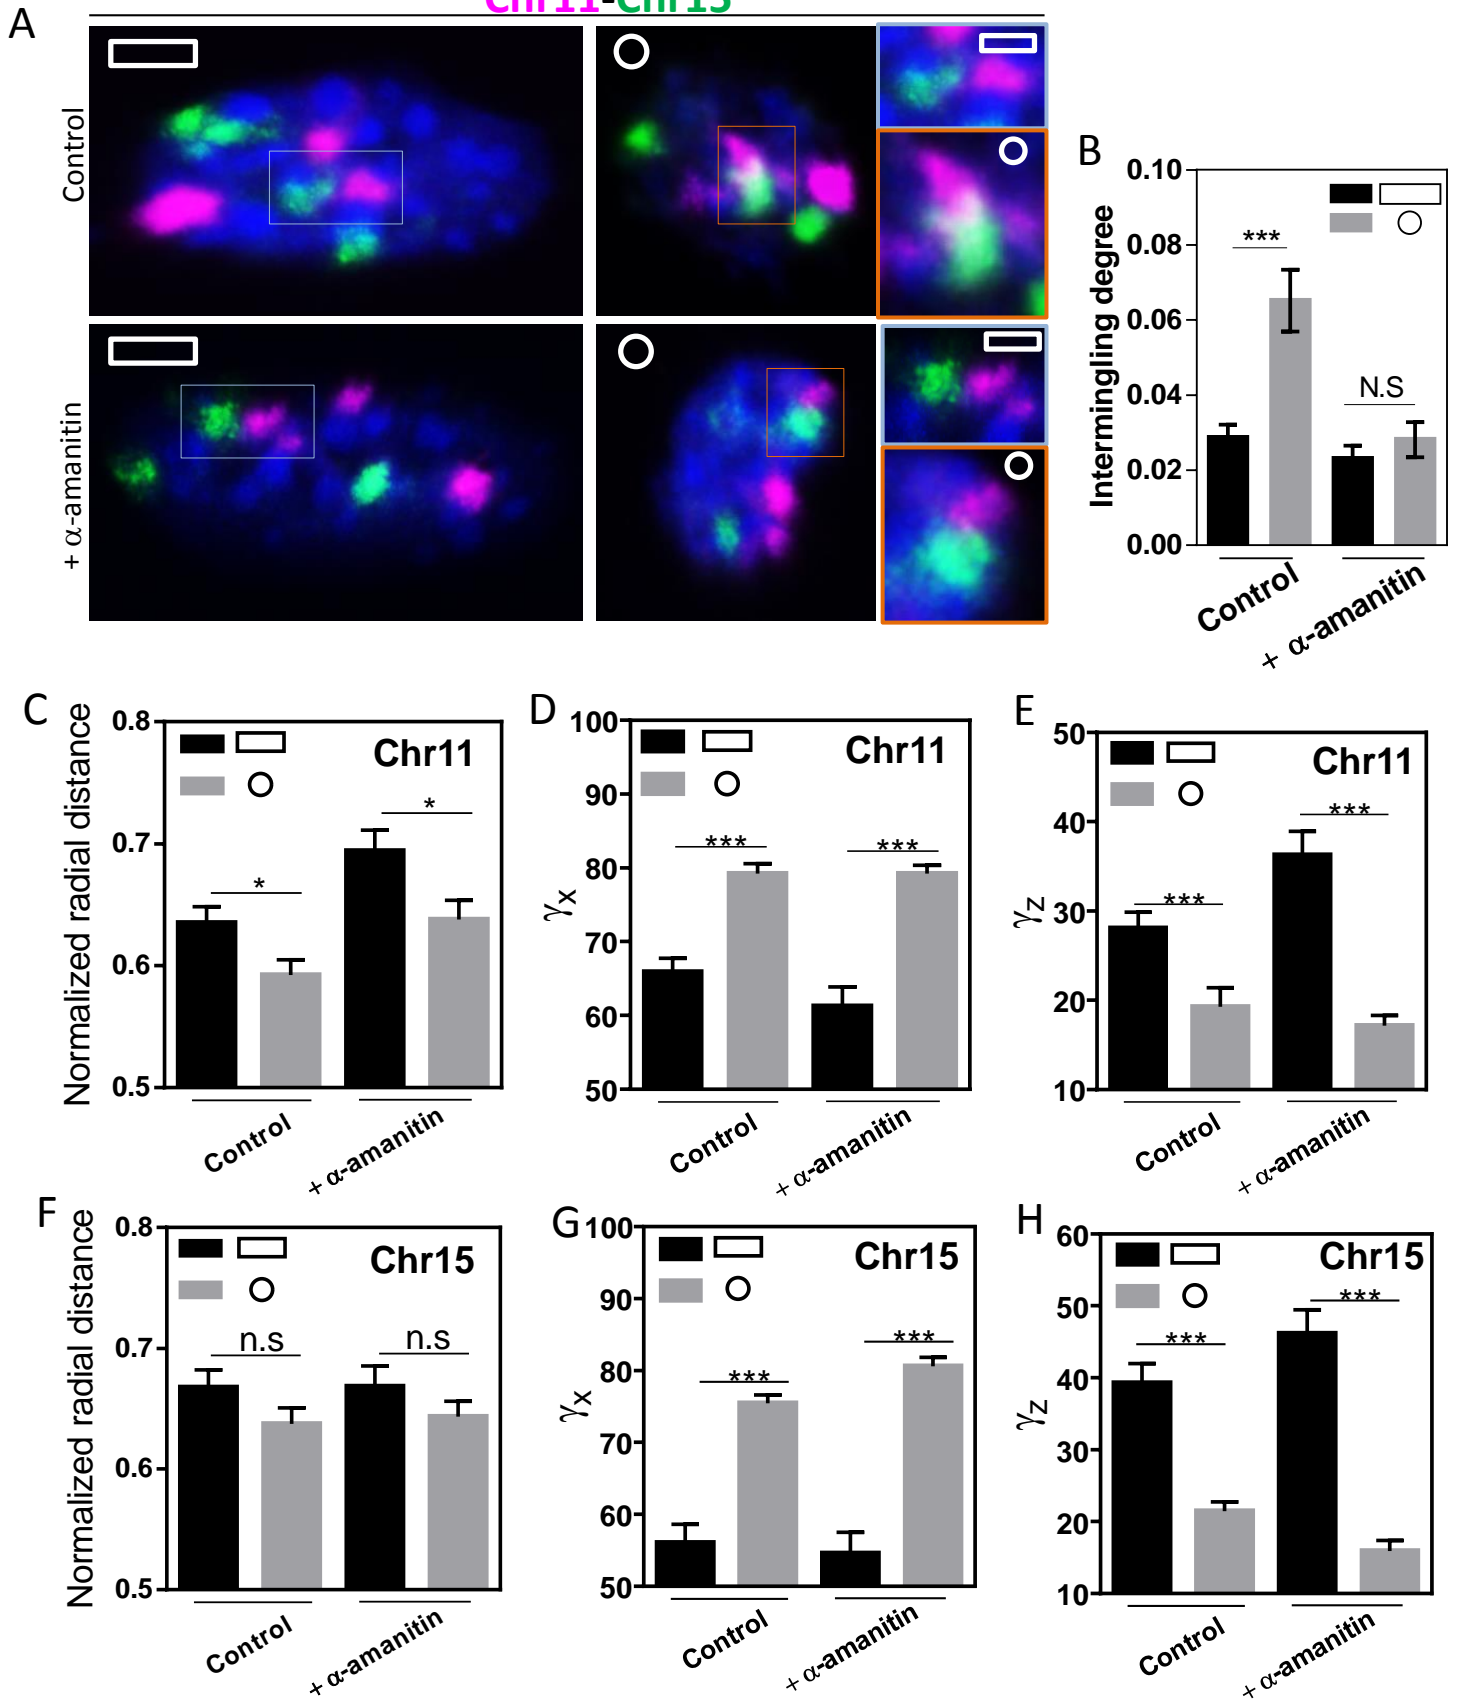

Figure S7

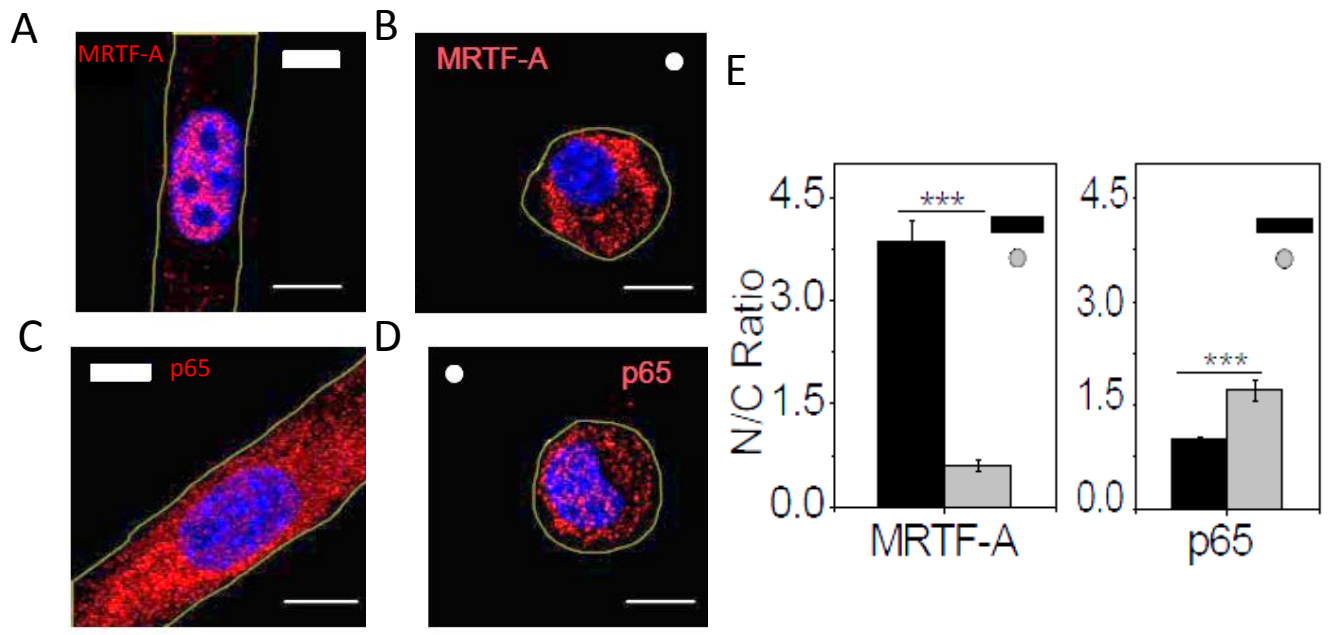

Figure S8

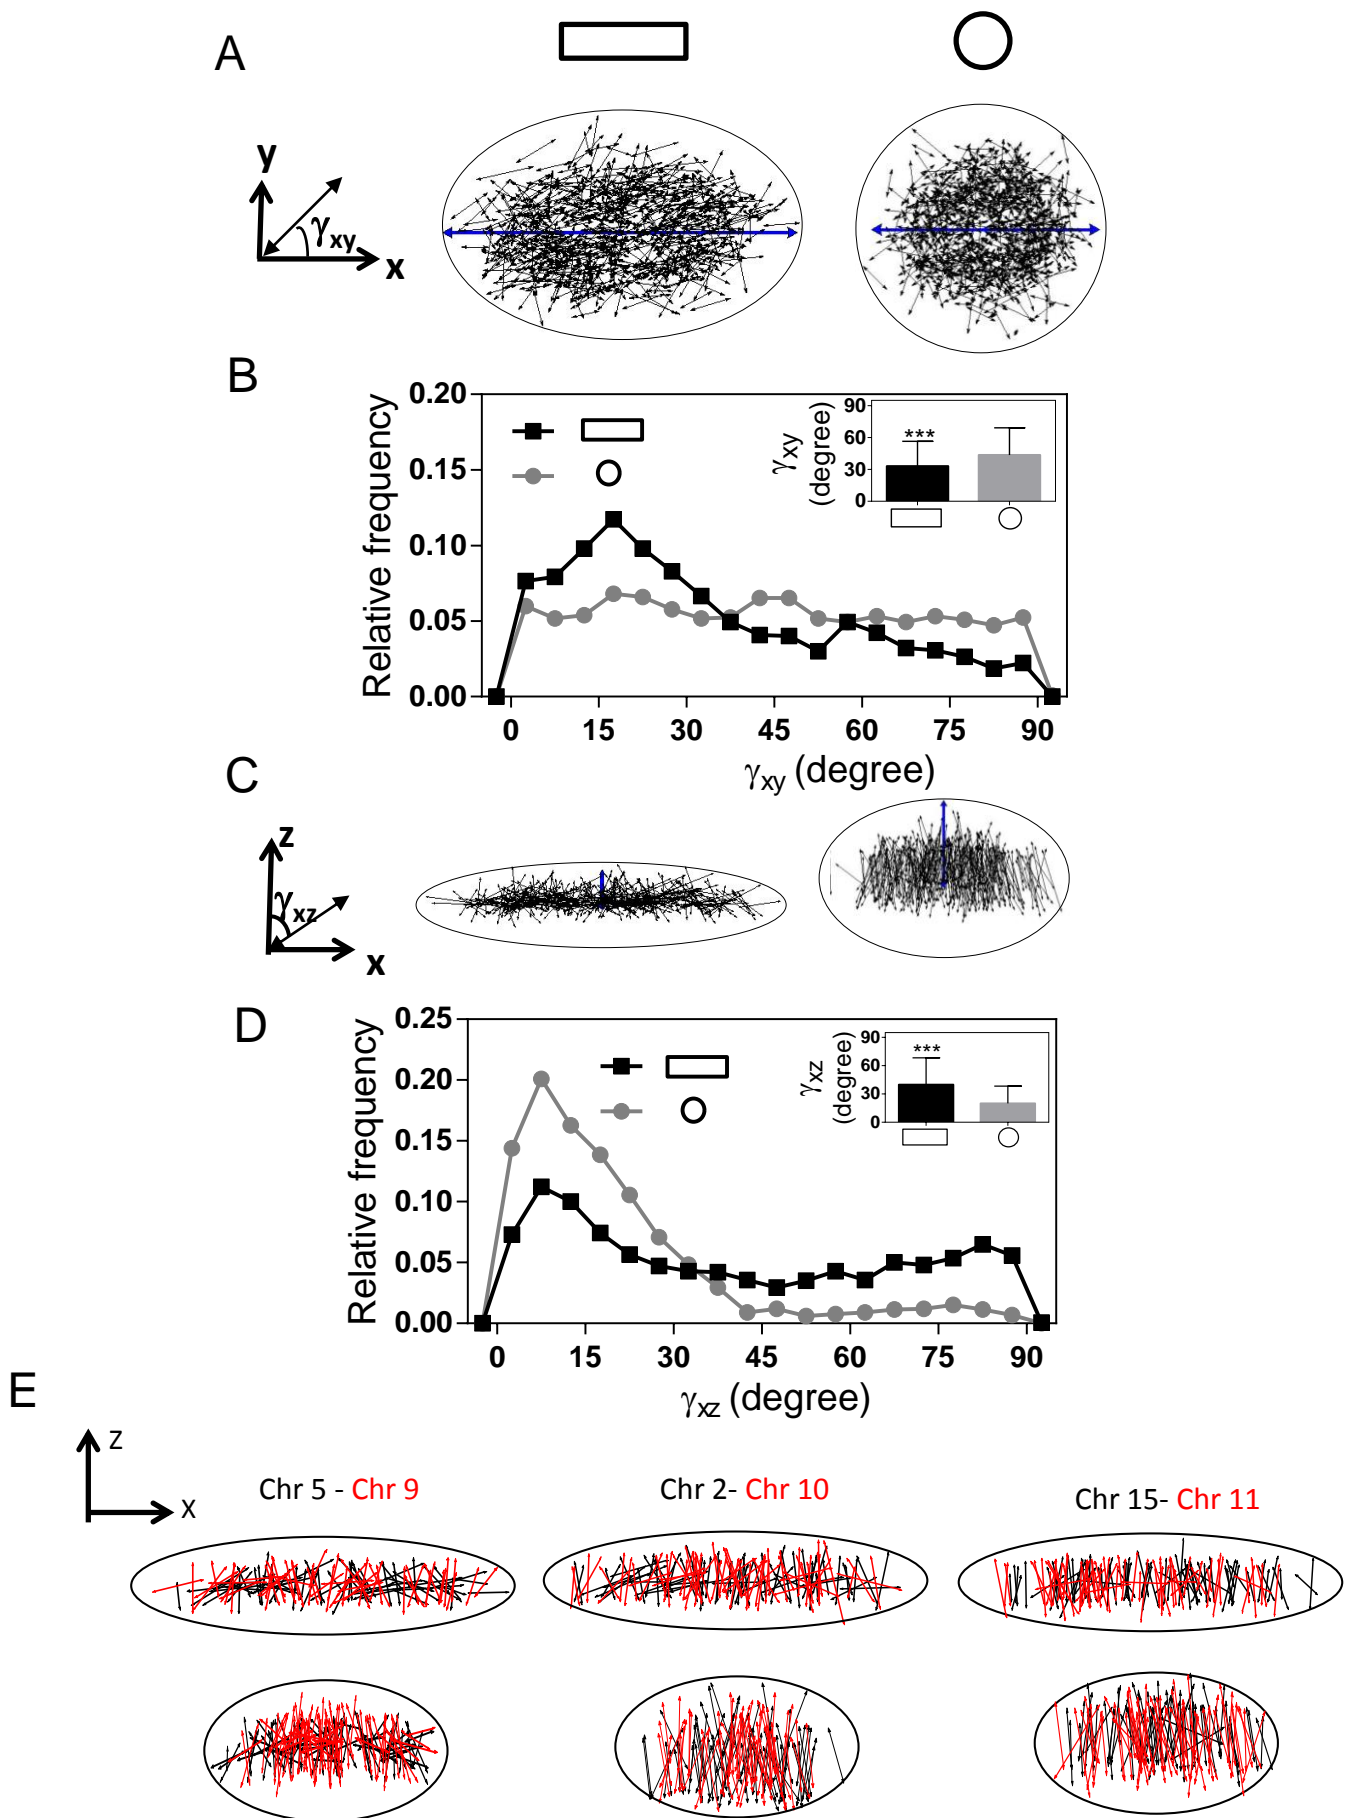

Figure S9

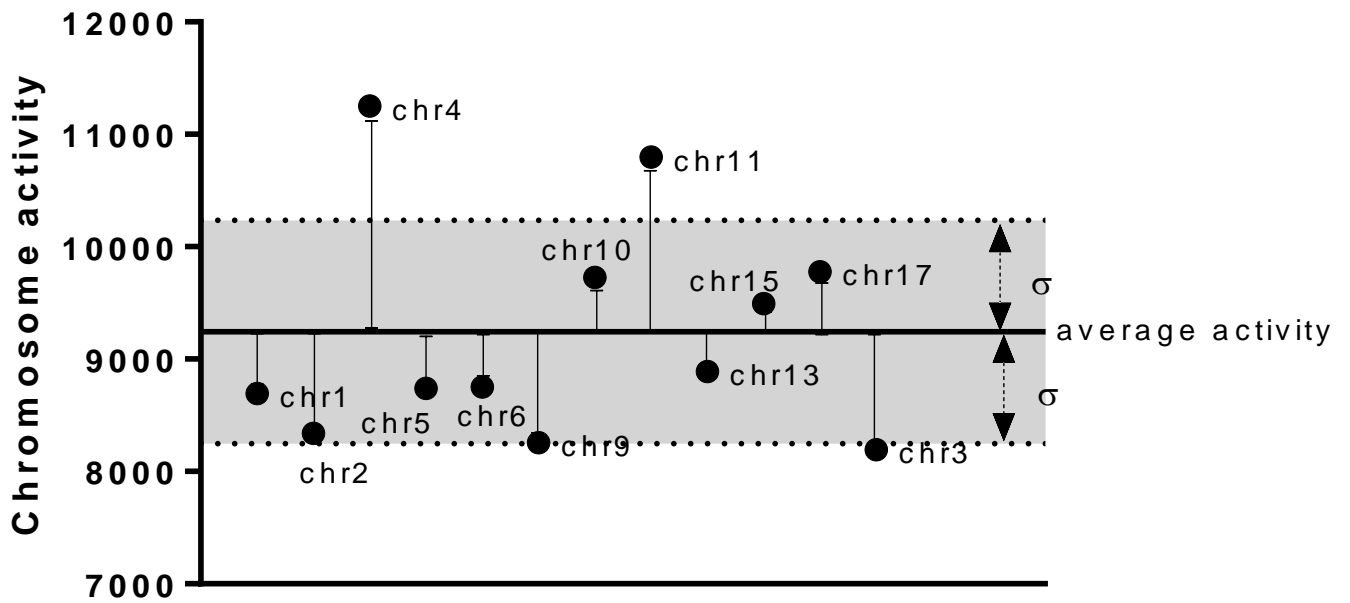

$$z = \frac{\text{chromosome activity} - \text{average activity}}{\text{standard deviation } (\sigma)}$$

Figure S10

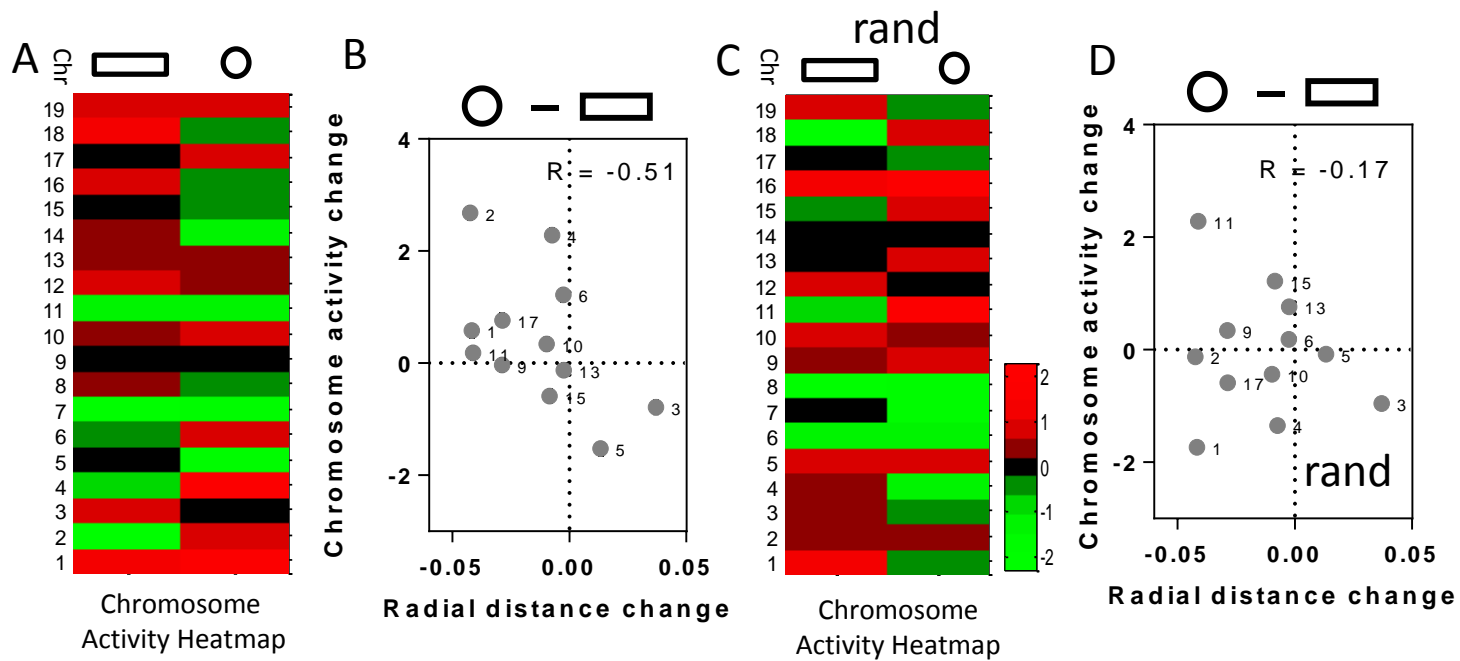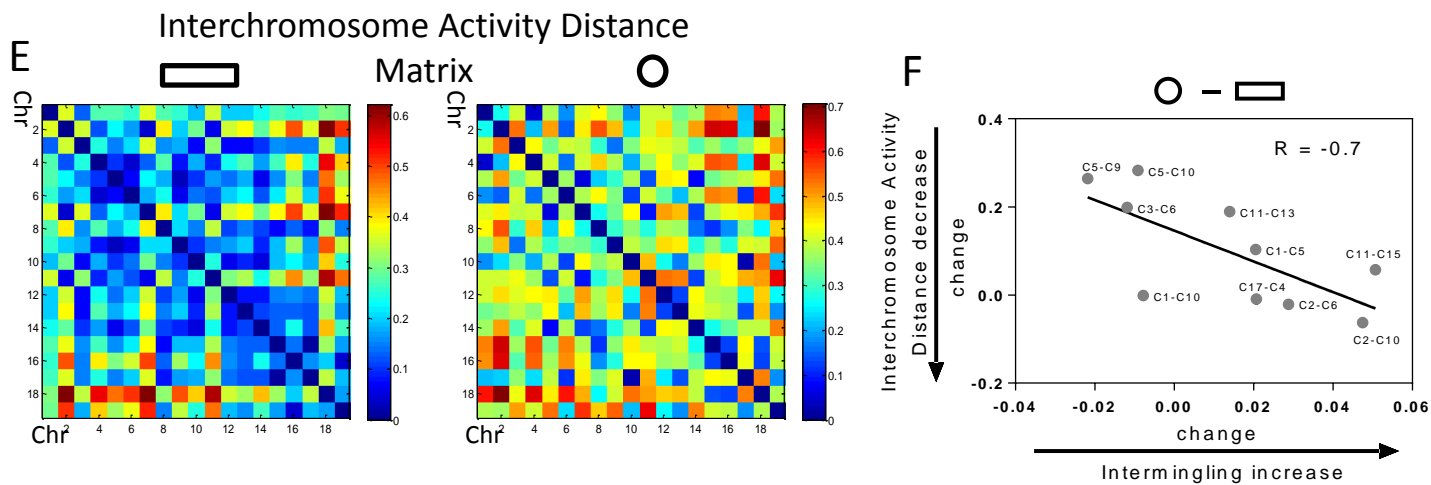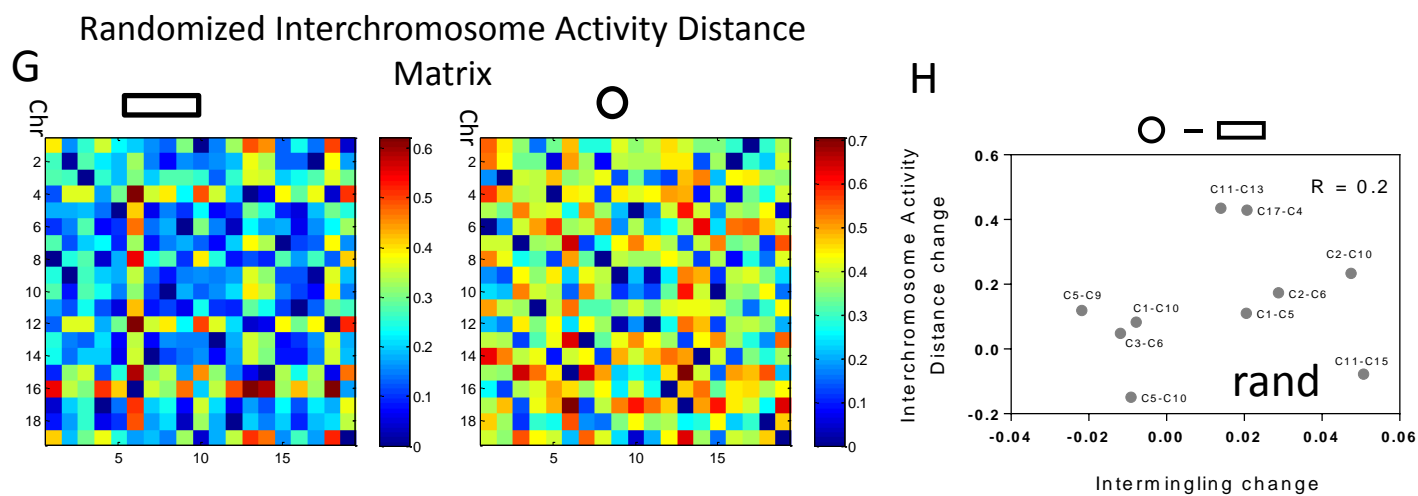

Figure S11

NF-kB target genes

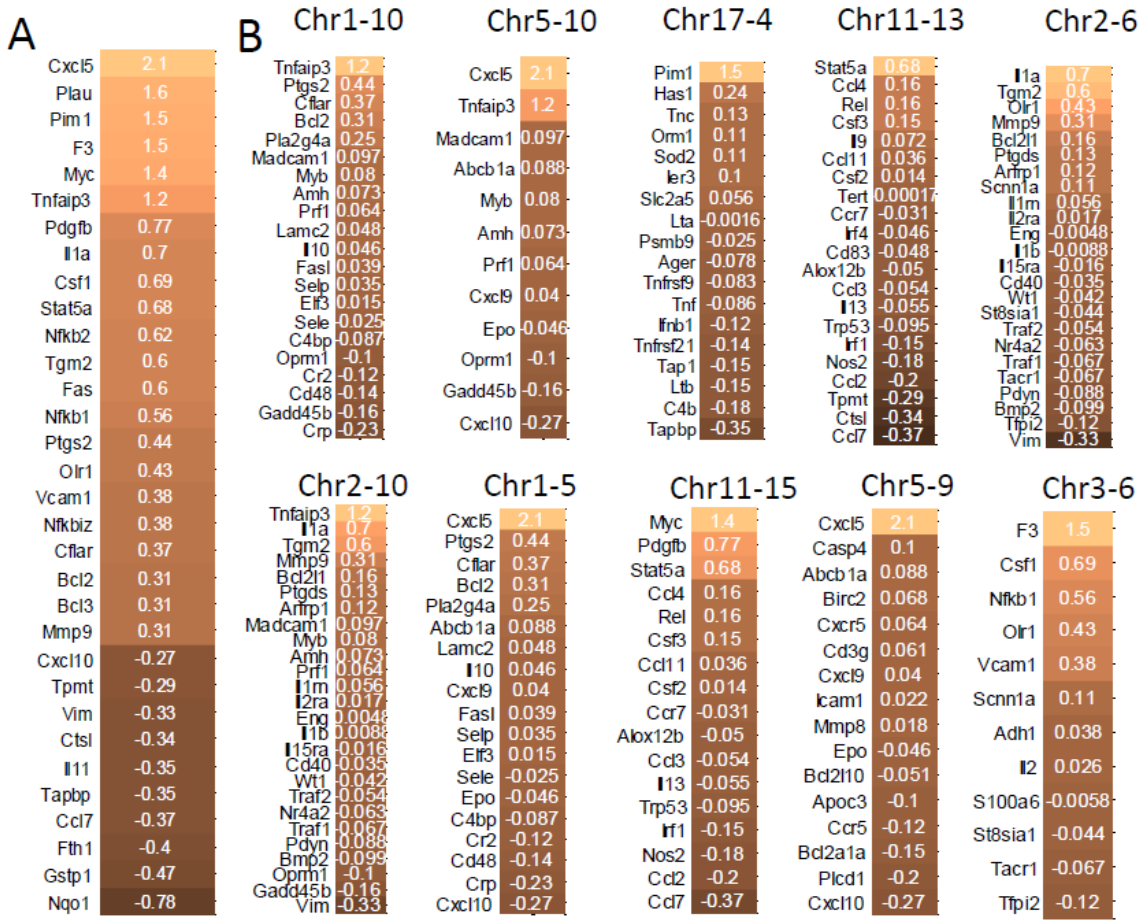



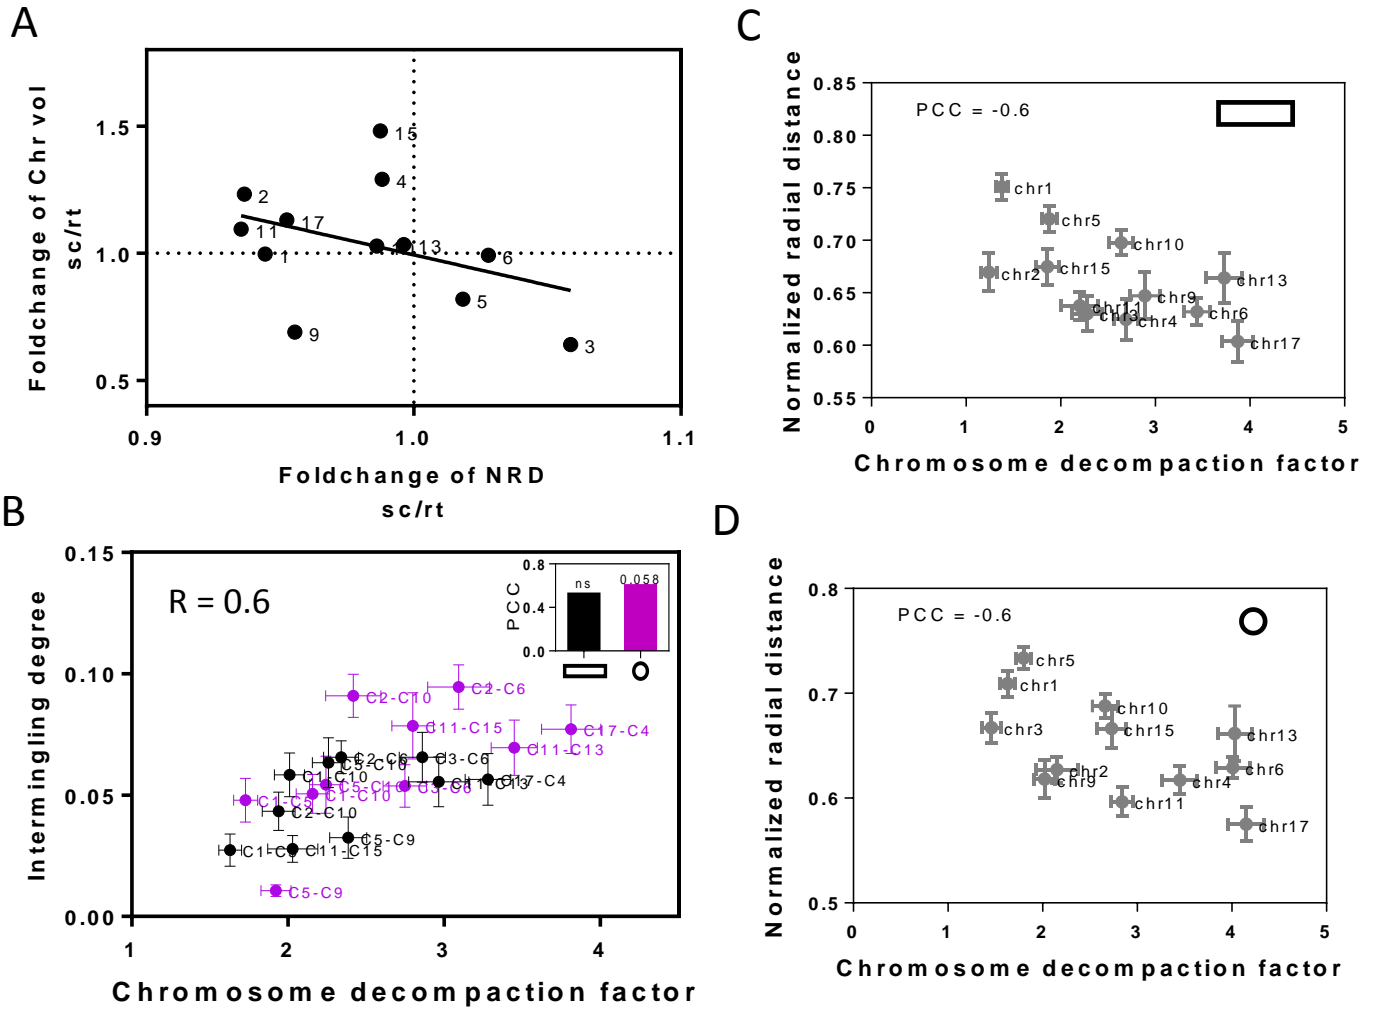

Figure S13

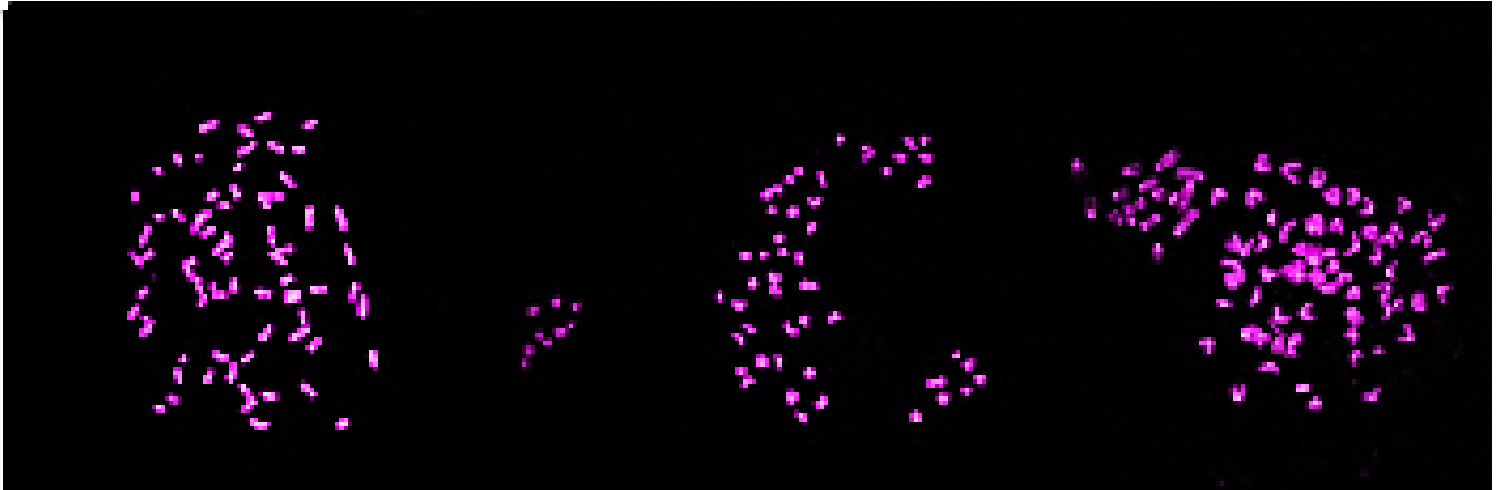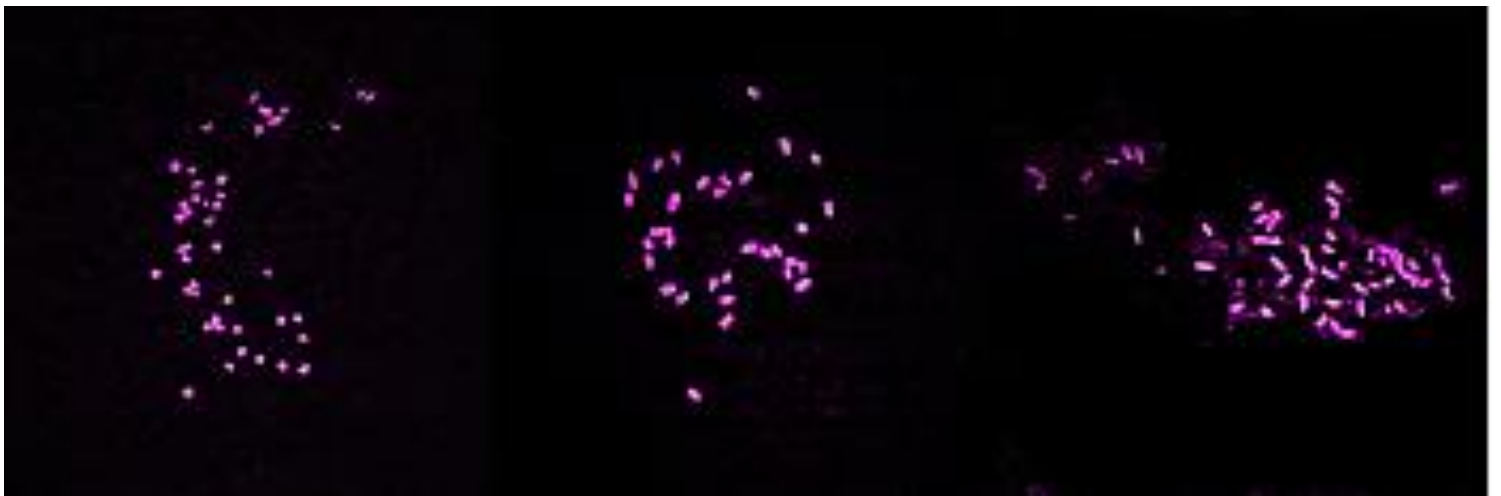

Figure S14

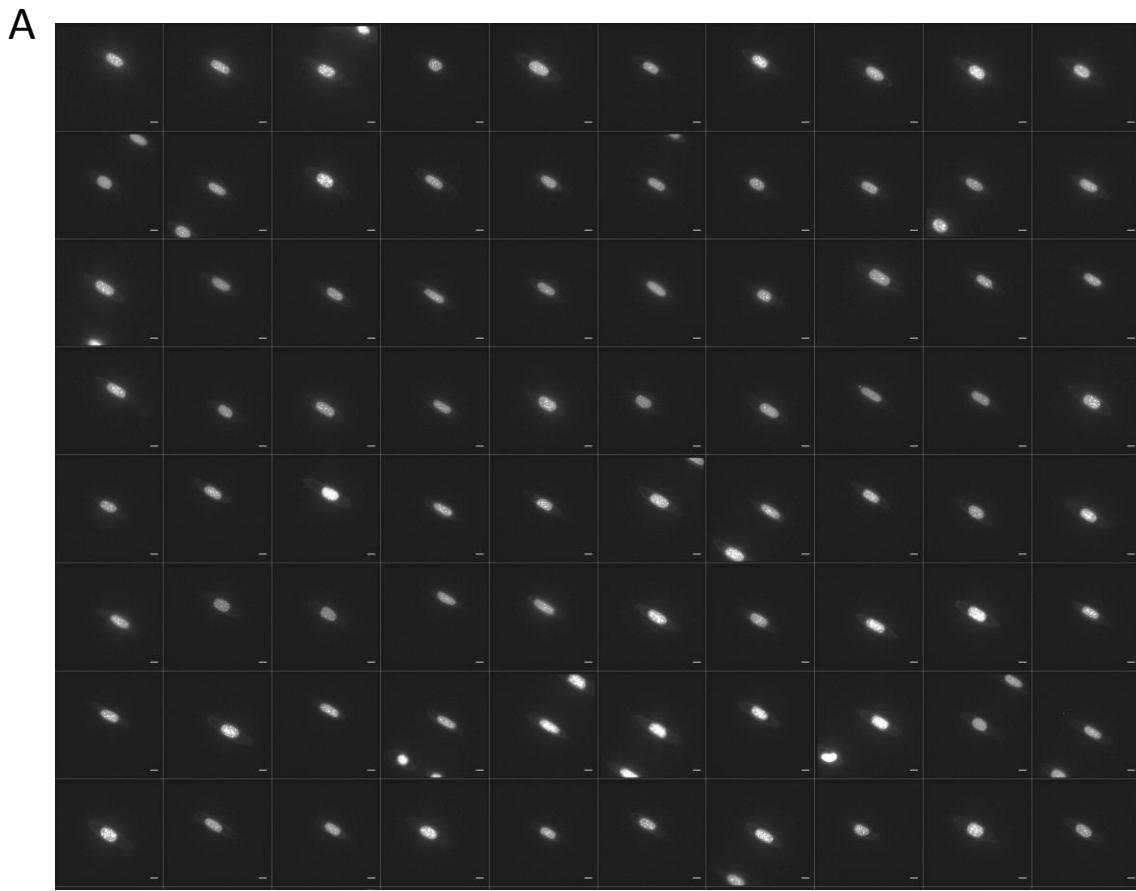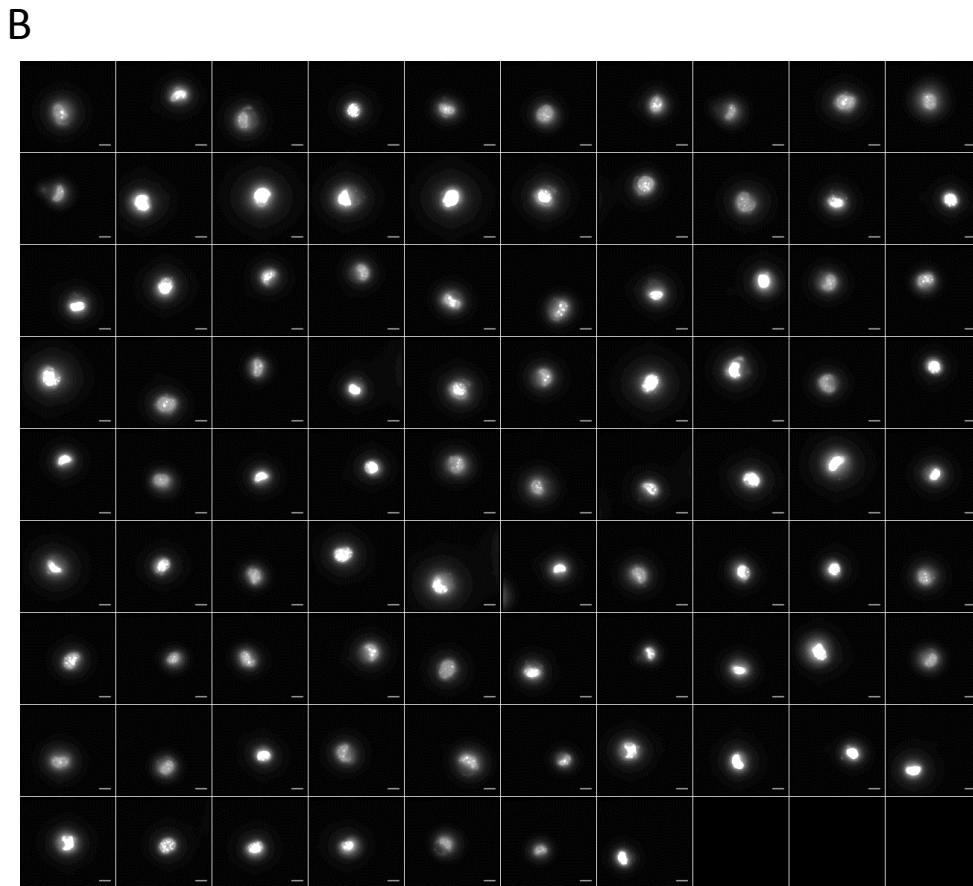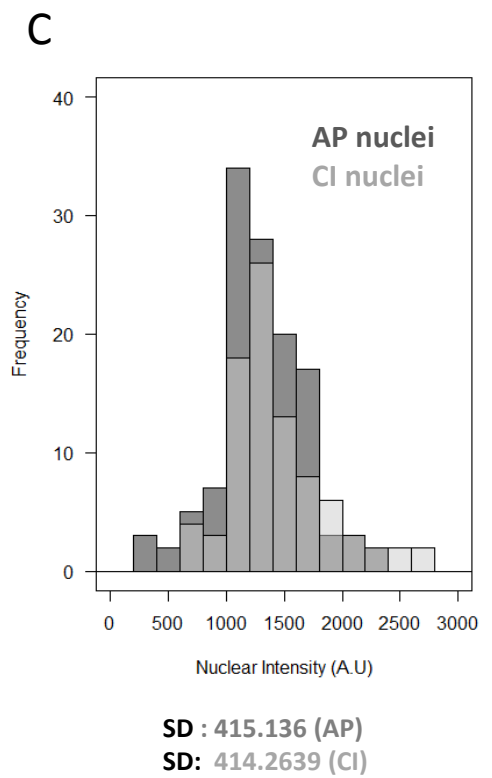

Figure S15

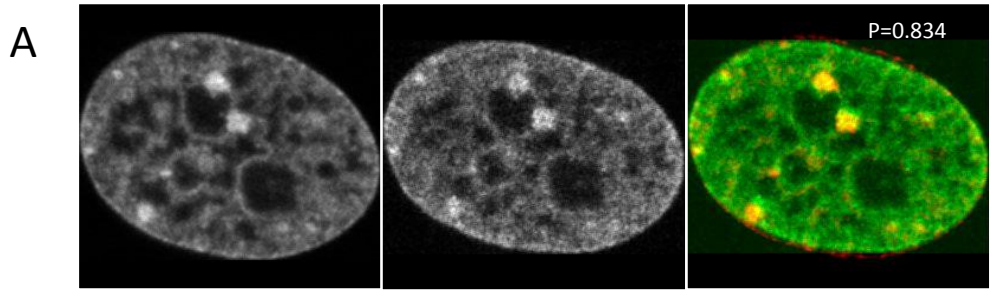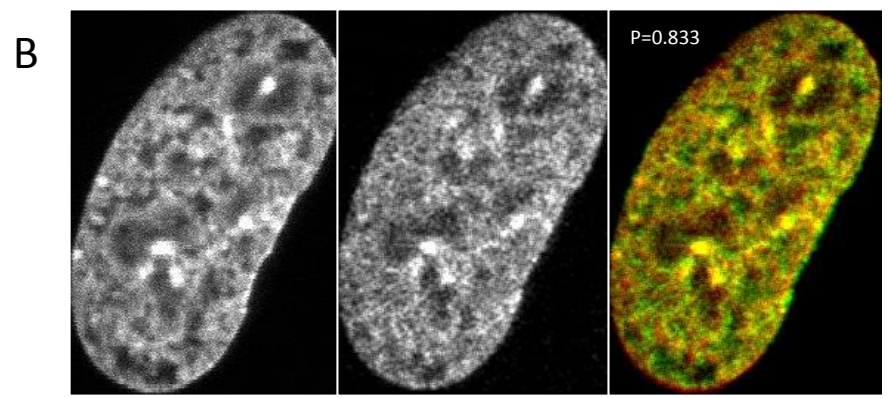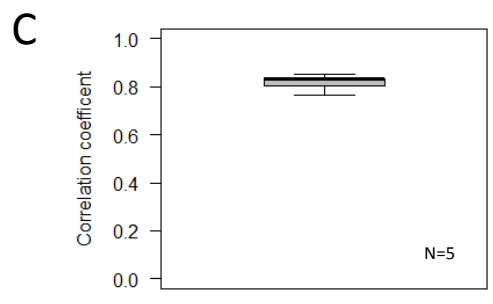

Figure S16
